# Supplementary material
Source: PubMed Central journal article supplement (PMC2775040)
Supplement: NIHMS99297-supplement-1.pdf [file NIHMS99297-supplement-1.pdf]

**Supplementary Figure 1.** Additional examples of genes within the three groups of TNF-activated genes. 3T3 fibroblasts were stimulated with TNF (10 ng/ml). At indicated times after addition of TNF, mRNA transcripts encoding genes in each group were measured by RT-qPCR and normalized to *Rpl32* as described in **Methods**. The results are shown as mean  $\pm$  s.d. of triplicate samples and representative of four independent experiments with similar results.

**Supplementary Figure 2.** Kinetic patterns of TNF-induced gene expression in human dermal primary fibroblasts. Cells were exposed to continual TNF (10 ng/ml) stimulation (TNF; solid diamond), or to 6 hours of TNF followed by medium alone (TNF removal; open square). At indicated times after initial addition of TNF, mRNA transcripts encoding indicated genes were measured by RT-qPCR and normalized to *Rpl32* as described in **Methods**. However, *Rpl32* in these cells was expressed in approximately 100-fold lower amounts than in 3T3 cells. Note that only one time point was taken after removal of TNF so the kinetics of the drop in mRNA concentration are not evident. The results are shown as mean  $\pm$  s.d. of triplicate samples from one representative experiment. Numbers in parentheses show the half life of the mRNA, determined by addition to ActD at 6h following TNF stimulation, which is similar to that determined at 0.5h of TNF stimulation for most genes (data not shown)

**Supplementary Figure 3.** Effect of TNF concentration on gene expression patterns. 3T3 fibroblasts were treated with 10 ng/ml (solid diamond) or 1 ng/ml (open square) TNF and mRNA transcripts encoding indicated genes were measured by qRT-PCR. The data are mean  $\pm$  s.d. of triplicate samples and representative of three independent experiments with similar results.

**Supplementary Figure 4.** Schematic of GFP transgene constructs with various promoters and 3'UTRs.

# Supplementary Figure 1

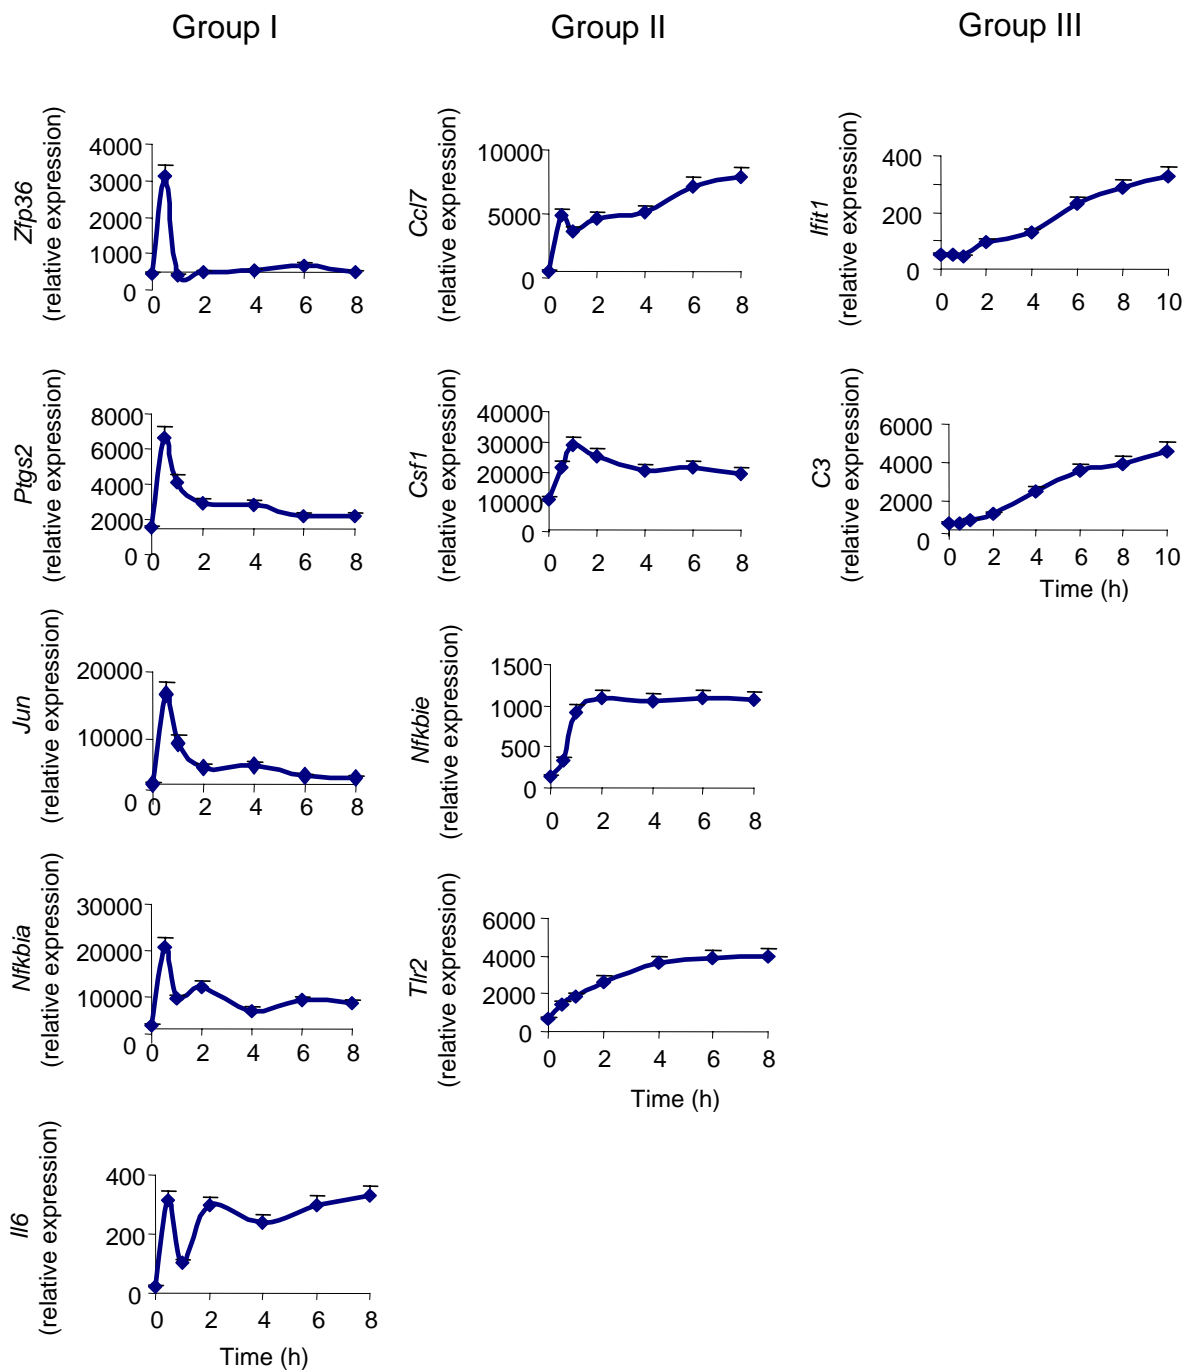

## Supplementary Figure 2.

◆ TNF  
□ TNF removal

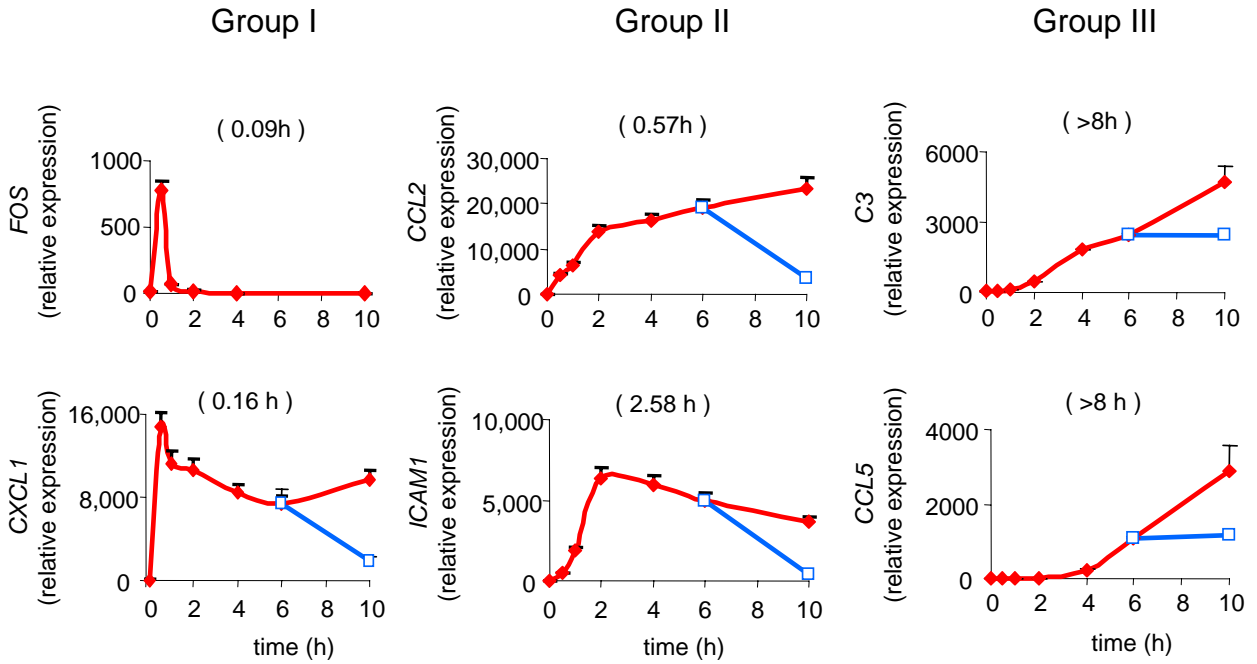

# Supplementary Fig. 3

◆ TNF 10 ng/ml  
□ TNF 1 ng/ml

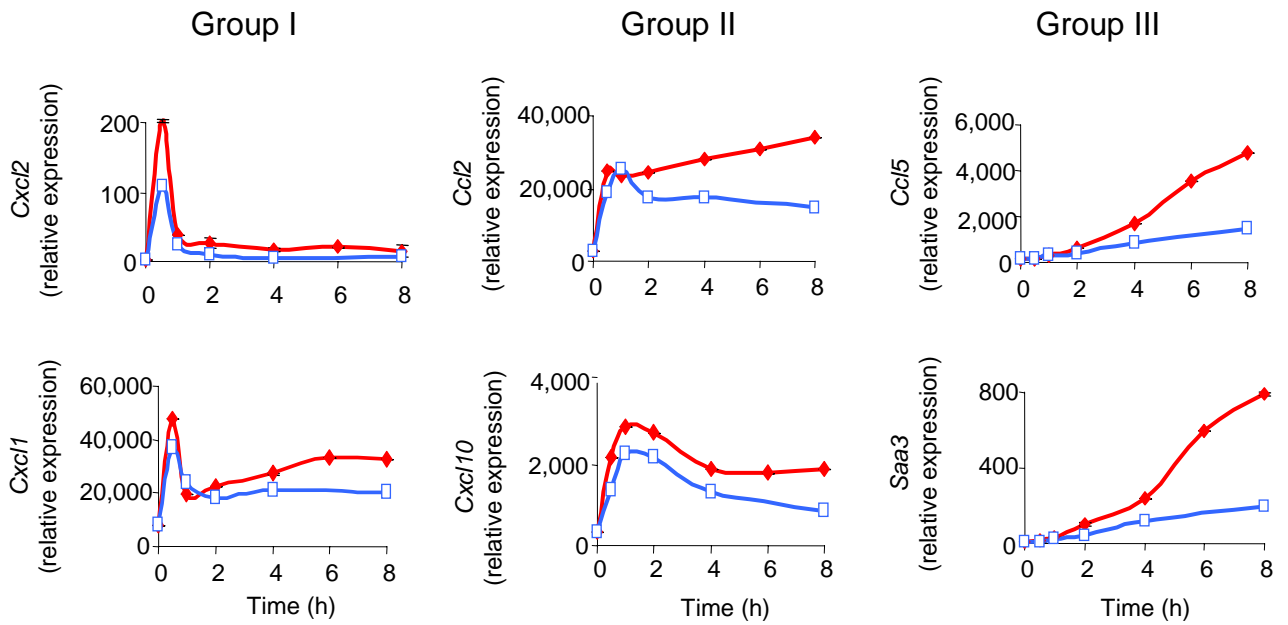



## Supplementary Table 1. List of the three groups of genes

Group I genes, (fold $\geq$ 2.0, p<0.01)

| Gene name                           | Alias, or sequence description                 | Accession # | relative basal level | TNF fold induction |       |       |
|-------------------------------------|------------------------------------------------|-------------|----------------------|--------------------|-------|-------|
|                                     |                                                |             |                      | 0.5h               | 2h    | 12h   |
| <b>Blood vessel regulators</b>      |                                                |             |                      |                    |       |       |
| <i>Ptgs2</i>                        | Cox-2                                          | M94967      | 1.59                 | 2.01               | -1.46 | -2.94 |
| <i>Edn1</i>                         | endothelin 1                                   | D43775      | 0.30                 | 3.98               | -1.19 | 1.02  |
| <i>Ereg</i>                         | epiregulin                                     | NM_007950   | 1.72                 | 2.12               | 1.32  | -1.08 |
| <b>Cell death, survival</b>         |                                                |             |                      |                    |       |       |
| <i>Gadd45b</i>                      | growth arrest and DNA-damage-inducible 45 beta | AK010420    | 1.80                 | 3.16               | 2.36  | 1.69  |
| <i>Ier2</i>                         | immediate early response 2                     | NM_010499   | 1.20                 | 2.35               | -1.18 | -1.82 |
| <b>Chemokine or cytokine</b>        |                                                |             |                      |                    |       |       |
| <i>Cxcl1</i>                        | Gro1                                           | NM_008176   | 0.70                 | 28.08              | 11.98 | 6.20  |
| <i>Cxcl2</i>                        | Scyb2                                          | NM_009140   | 0.02                 | 44.86              | 9.09  | 3.59  |
| <i>Il6</i>                          | interleukin 6                                  | NM_031168   | 0.31                 | 14.20              | 8.40  | 6.30  |
| <i>Lif</i>                          | leukemia inhibitory factor                     | AF065917    | 0.17                 | 5.69               | 3.41  | 2.06  |
| <b>mRNA stability</b>               |                                                |             |                      |                    |       |       |
| <i>Btg2</i>                         | B-cell translocation gene 2                    | NM_007570   | 0.24                 | 3.07               | 1.22  | -2.19 |
| <i>Zfp36</i>                        | TTP                                            | X14678      | 0.49                 | 6.65               | 1.84  | -1.04 |
| <b>Signal transduction</b>          |                                                |             |                      |                    |       |       |
| <i>Tnfrsf25</i>                     | A20                                            | NM_009397   | 1.41                 | 9.71               | 5.99  | 2.51  |
| <i>Ier3</i>                         | immediate early response 3                     | NM_133662.1 | 5.34                 | 4.08               | 2.49  | 1.93  |
| <i>Sqstm1</i>                       | sequestosome 1                                 | NM_011018   | 0.36                 | 2.04               | 1.48  | -1.00 |
| Transcription factors or modulators |                                                |             |                      |                    |       |       |
| <i>Atf3</i>                         | activating transcription factor 3              | NM_007498   | 0.38                 | 2.04               | 1.62  | 1.95  |
| <i>Axud1</i>                        | Axud1                                          | BG070296    | 0.31                 | 2.45               | -1.66 | -4.62 |
| <i>c-Jun</i>                        | Jun oncogene                                   | NM_010591   | 2.69                 | 2.00               | 1.01  | -1.10 |
| <i>c-Fos</i>                        | FBJ osteosarcoma oncogene                      | AV026617    | 0.49                 | 4.71               | -1.92 | -6.42 |
| <i>Irf1</i>                         | interferon-related developmental regulator 1   | BB531645    | 0.15                 | 3.51               | 1.60  | -1.14 |
| <i>Nfkb1a</i>                       | I $\kappa$ Ba                                  | NM_010907   | 1.42                 | 10.03              | 7.47  | 3.63  |
| <i>Nfkb2</i>                        | I $\kappa$ Bzeta                               | NM_030612   | 0.62                 | 5.71               | 3.63  | 2.00  |
| <i>Irf1</i>                         | interferon regulatory factor 1                 | NM_008390   | 0.77                 | 7.69               | 5.41  | 2.86  |
| <i>Junb</i>                         | Jun-B oncogene                                 | NM_008416   | 1.44                 | 2.14               | 1.12  | -1.83 |
| <i>Tieg</i>                         | TGFB inducible early growth response           | NM_013692   | 1.91                 | 2.26               | 1.18  | -1.86 |
| <b>Others</b>                       |                                                |             |                      |                    |       |       |
| <i>Slc25a25</i>                     | solute carrier family 25                       | BC019978.1  | 0.28                 | 2.35               | 1.15  | -1.29 |

## Supplementary Table 1. Continued

### Group II genes

(only those fold>=3, p<0.01 are shown)

| Gene Name                             | Sequence Description                       | Accession # | Relative basal level | TNF fold induction |       |       |
|---------------------------------------|--------------------------------------------|-------------|----------------------|--------------------|-------|-------|
|                                       |                                            |             |                      | 0.5h               | 2h    | 12h   |
| <b>Anti-viral and immune response</b> |                                            |             |                      |                    |       |       |
| <i>Ifi47</i>                          | interferon gamma inducible protein, 47 kDa | NM_008330   | 0.02                 | 3.50               | 37.17 | 20.91 |
| <i>Tgtp</i>                           | T-cell specific GTPase                     | NM_011579   | 0.03                 | 1.36               | 24.75 | 9.73  |
| <b>Blood vessel regulators</b>        |                                            |             |                      |                    |       |       |
| <i>Gch</i>                            | GTP cyclohydrolase 1                       | NM_008102   | 0.16                 | 1.24               | 6.11  | 5.67  |
| <b>Cell adhesion and migration</b>    |                                            |             |                      |                    |       |       |
| <i>Icam1</i>                          | intercellular adhesion molecule 1          | BC008626    | 0.03                 | 3.09               | 30.01 | 22.70 |
| <i>Vcam1</i>                          | vascular cell adhesion molecule 1          | BB250384    | 1.29                 | 2.34               | 5.30  | 4.36  |
| <b>Cell death and survival</b>        |                                            |             |                      |                    |       |       |
| <i>Birc2</i>                          | baculoviral IAP repeat-containing 2        | NM_007464   | 0.35                 | 1.53               | 5.25  | 6.27  |
| <i>Tnfrsf6</i>                        | Fas                                        | NM_007987   | 0.50                 | 1.11               | 3.54  | 2.66  |
| <b>Chemokines or cytokines</b>        |                                            |             |                      |                    |       |       |
| <i>Ccl2</i>                           | MCP-1, Scya2                               | AF065933    | 0.74                 | 9.10               | 17.44 | 19.62 |
| <i>Ccl20</i>                          | MIP-3a, Scya20                             | AF099052    | 0.02                 | 100                | 100   | 100   |
| <i>Ccl7</i>                           | MCP-3, Scya7                               | AF128193    | 0.34                 | 5.90               | 10.53 | 14.09 |
| <i>Cx3cl1</i>                         | Scyd1, Fractalkine                         | AF010586    | 0.88                 | 1.90               | 4.82  | 2.62  |
| <i>Cxcl10</i>                         | IP-10, Scyb10                              | NM_021274   | 0.26                 | 10.91              | 31.91 | 17.03 |
| <i>Cxcl5</i>                          | ENA-78, Scyb5                              | NM_009141   | 2.87                 | 2.93               | 3.36  | 2.72  |
| <i>CSF1</i>                           | colony stimulating factor 1 (macrophage)   | NM_007778   | 2.53                 | 1.90               | 3.00  | 2.10  |
| <i>Ch25h</i>                          | cholesterol 25-hydroxylase                 | NM_009890   | 0.09                 | 7.87               | 15.15 | 13.50 |
| <b>Signal transduction</b>            |                                            |             |                      |                    |       |       |
| <i>Ifngr2</i>                         | Interferon gamma receptor 2                | BF537076    | 0.25                 | 1.26               | 3.01  | 3.04  |
| <i>p21</i>                            | cyclin-dependent kinase inhibitor 1A (P21) | NM_007669   | 0.21                 | 2.46               | 4.26  | 1.19  |
| <i>Ripk2</i>                          | RIP2,                                      | NM_138952.1 | 0.44                 | 1.62               | 8.22  | 2.41  |
| <i>S1pr3</i>                          | sphingosine-1-phosphate receptor 3         | AV238324    | 0.54                 | 1.37               | 3.36  | 3.11  |
| <i>Tlr2</i>                           | toll-like receptor 2                       | NM_011905   | 0.66                 | 2.67               | 7.30  | 4.79  |
| <i>Cebpd</i>                          | CEBP beta                                  | BB831146    | 1.78                 | 1.22               | 4.36  | 1.93  |
| <i>Nfkbie</i>                         | IkBe                                       | BB820441    | 0.15                 | 3.03               | 28.35 | 20.00 |
| <i>Relb</i>                           |                                            | NM_009046   | 0.09                 | 2.78               | 9.40  | 8.05  |
| <i>Tnfaip2</i>                        | B94                                        | BB233088    | 0.72                 | 1.53               | 3.83  | 1.95  |
| <i>Npal1</i>                          | RIKEN cDNA 3830408G10 gene                 | AK014427    | 0.23                 | 1.42               | 3.14  | 1.24  |
| <i>Rnd1</i>                           |                                            | BE852181    | 0.99                 | 2.67               | 3.16  | 3.25  |
| <i>Tmem140</i>                        | transmembrane protein 140                  | BC020080.1  | 0.44                 | 1.04               | 3.32  | 2.36  |
| <i>Stx11</i>                          | RIKEN cDNA 5830405C08 gene                 | AK017897    | 0.52                 | 1.82               | 4.71  | 2.23  |

## Supplementary Table 1. Continued

Group III genes  
(only those fold  $\geq 3$ ,  $p < 0.01$  are shown)

| Gene Name                                  | Alias, or Sequence description                              | Accession # | relative basal level | TNF fold induction |      |       |
|--------------------------------------------|-------------------------------------------------------------|-------------|----------------------|--------------------|------|-------|
|                                            |                                                             |             |                      | 0.5h               | 2h   | 12h   |
| <b>Antigen presentation</b>                |                                                             |             |                      |                    |      |       |
| <i>H2-D1</i>                               | histocompatibility 2, D region locus 1                      | M86502      | 1.29                 | 1.20               | 1.75 | 4.02  |
| <i>H2-K</i>                                | histocompatibility 2, K region                              | BC011306    | 0.37                 | 1.02               | 2.56 | 29.68 |
| <i>H2-L</i>                                | histocompatibility 2, L region                              | M34962      | 0.23                 | 1.30               | 1.70 | 3.66  |
| <i>Ii</i>                                  | Ia-associated invariant chain                               | BC003476    | 0.16                 | 1.05               | 2.49 | 7.31  |
| <i>Psmb10</i>                              | proteasome subunit, beta type 10                            | NM_013640   | 0.81                 | 1.13               | 2.52 | 5.02  |
| <i>Tapbp</i>                               | TAP binding protein                                         | AF043943    | 4.55                 | 1.08               | 1.74 | 3.11  |
| <b>Anti-viral and immune response</b>      |                                                             |             |                      |                    |      |       |
| <i>C3</i>                                  | complement component 3                                      | K02782      | 0.07                 | 2.65               | 6.14 | 55.51 |
| <i>Gbp2</i>                                | guanylate nucleotide binding protein 2                      | NM_010260   | 0.06                 | 1.26               | 7.69 | 36.09 |
| <i>Ifit1</i>                               | interferon-induced protein with tetratricopeptide repeats 1 | NM_008331   | 0.10                 | -1.00              | 2.40 | 5.84  |
| <b>Cell adhesion and migration</b>         |                                                             |             |                      |                    |      |       |
| <i>Casp4</i>                               | caspase 11                                                  | NM_007609   | 0.04                 | 1.86               | 7.81 | 18.72 |
| <i>Cdsn</i>                                | corneodesmosin                                              | BM231053    | 0.61                 | 1.08               | 1.65 | 5.89  |
| <b>Cell death and survival</b>             |                                                             |             |                      |                    |      |       |
| <i>Mt2</i>                                 | metallothionein 2                                           | AA796766    | 1.35                 | 1.58               | 3.14 | 5.24  |
| <i>Sod3</i>                                | superoxide dismutase 3, extracellular                       | NM_011435   | 0.27                 | 1.13               | 1.67 | 3.04  |
| <i>Serpina3g</i>                           | serine protease inhibitor 2-1,                              | BC002065    | 0.06                 | 1.11               | 5.65 | 19.18 |
| <i>Ubd</i>                                 | ubiquitin D                                                 | NM_023137   | 0.09                 | -1.08              | 1.71 | 9.14  |
| <b>Chemokines and cytokines</b>            |                                                             |             |                      |                    |      |       |
| <i>Ccl5</i>                                | RANTES, Sca5                                                | NM_013653   | 0.02                 | -1.74              | 33.6 | 100   |
| <i>Ccl9</i>                                | small inducible cytokine A9                                 | AF128196    | 0.24                 | 1.41               | 2.47 | 4.11  |
| <i>Lcn2</i>                                | lipocalin 2                                                 | X14607      | 0.16                 | -1.42              | 1.01 | 4.81  |
| <b>Signaling transduction</b>              |                                                             |             |                      |                    |      |       |
| <i>Il13ra1</i>                             | IL13 receptor a1                                            | BI081033    | 0.19                 | 1.02               | 2.17 | 3.44  |
| <i>Il1rl1</i>                              | interleukin 1 receptor-like 1                               | NM_010743   | 0.88                 | 1.25               | 2.35 | 6.13  |
| <i>Naf1</i>                                | Nef-associated factor 1, Abin-1                             | AJ242777    | 1.00                 | 1.01               | 2.41 | 4.30  |
| <b>Tissue remodeling and wound healing</b> |                                                             |             |                      |                    |      |       |
| <i>Enpp2</i>                               | ectonucleotide pyrophosphatase/phosphodiesterase 2          | BC003264    | 0.30                 | 1.08               | 1.74 | 13.07 |
| <i>Mmp13</i>                               | matrix metalloproteinase 13                                 | NM_008607   | 0.15                 | 1.53               | 4.86 | 16.48 |
| <i>Mmp3</i>                                | matrix metalloproteinase 3                                  | NM_010809   | 1.37                 | 1.20               | 1.86 | 6.57  |
| <i>Serpinf1</i>                            | , PEDF                                                      | NM_011340   | 2.18                 | 1.09               | 1.26 | 4.08  |
| <i>Ppicap</i>                              | peptidylprolyl isomerase C-associated protein               | NM_011150   | 0.20                 | 1.17               | 1.20 | 3.07  |
| <b>Others (unknown function)</b>           |                                                             |             |                      |                    |      |       |
| 1110004C05Rik                              | RIKEN cDNA 1110004C05 gene                                  | BC010291    | 3.38                 | 1.24               | 1.97 | 3.77  |
| <i>Abca1</i>                               | ATP-binding cassette, sub-family A1                         | BB144704    | 0.07                 | 2.07               | 2.30 | 7.08  |
| <i>Al561871</i>                            | expressed sequence Al561871                                 | BI143915    | 0.17                 | -1.20              | 1.51 | 5.08  |
| <i>Al882074</i>                            | expressed sequence Al882074                                 | BB730912    | 0.09                 | 1.29               | 3.32 | 5.91  |
| <i>Arts1</i>                               | ESTs                                                        | AV287655    | 0.10                 | 1.16               | 1.83 | 3.59  |
| <i>Lhfp12</i>                              | lipoma HMGIC fusion partner-like 2                          | BG917242    | 0.02                 | 1.82               | 6.77 | 23.29 |



|               |                               |            |      |       |      |       |
|---------------|-------------------------------|------------|------|-------|------|-------|
| LOC677168     | cDNA, RIKEN clone:2900034J12, | AK019325   | 0.25 | -1.06 | 2.32 | 5.91  |
| AW049765      |                               | BC026642.1 | 0.10 | -1.41 | 2.57 | 21.95 |
| <i>Prnd</i>   | prion protein dublet          | AF165166   | 0.02 | 1.18  | 3.38 | 28.41 |
| <i>U90926</i> | cDNA sequence U90926          | NM_020562  | 0.38 | -1.16 | 1.03 | 3.72  |

---

## Supplementary Table 2. Stability of mRNA transcripts measured using two different approaches

mRNA stability (half life, h, mean  $\pm$  s.d., n=3 )

| Genes     |               | 6h TNF pretreatment  |                 |
|-----------|---------------|----------------------|-----------------|
|           |               | TNF $\alpha$ removal | ActD treatment  |
| Group II  | <i>Ccl20</i>  | 1.30 $\pm$ 0.12      | 3.33 $\pm$ 1.02 |
|           | <i>Ccl2</i>   | 1.38 $\pm$ 0.09      | 0.82 $\pm$ 0.01 |
|           | <i>Ccl7</i>   | 1.56 $\pm$ 0.21      | 1.32 $\pm$ 0.06 |
|           | <i>Tlr2</i>   | 1.93 $\pm$ 0.25      | 1.27 $\pm$ 0.32 |
|           | <i>Nfkbie</i> | 1.69 $\pm$ 0.07      | 1.90 $\pm$ 0.13 |
|           | <i>Cxcl10</i> | 1.87 $\pm$ 0.05      | 1.92 $\pm$ 0.05 |
|           | <i>Icam1</i>  | 1.66 $\pm$ 0.20      | 2.30 $\pm$ 0.56 |
|           | <i>CSF1</i>   | 5.33 $\pm$ 2.51      | 2.60 $\pm$ 0.43 |
|           | <i>Mmp10</i>  | 10.5 $\pm$ 18.0      | stable          |
| Group III | <i>Ifit1</i>  | stable               | 1.97 $\pm$ 1.22 |
|           | <i>Stat1</i>  | 9.76 $\pm$ 18.5      | 11.7 $\pm$ 12.7 |
|           | <i>C3</i>     | stable               | stable          |
|           | <i>Ccl5</i>   | stable               | stable          |
|           | <i>Mmp13</i>  | stable               | stable          |
|           | <i>Mmp3</i>   | stable               | stable          |
|           | <i>Saa3</i>   | stable               | stable          |

### Supplementary Table 3. Sequences of qPCR primers

| name           | alias                   | species | primer name                    | sequence                   |
|----------------|-------------------------|---------|--------------------------------|----------------------------|
| <i>Tnfrsf3</i> | A20                     | mouse   | A20_(1)_F                      | GAACAGCGATCAGGCCAGG        |
|                |                         |         | A20_(1)_R                      | GGACAGTTGGGTGTCTCACATT     |
| <i>actb</i>    | $\beta$ -actin          | mouse   | actin_F                        | AGGTGTGCACCTTTTATTGGTCTCAA |
|                |                         |         | actin_R                        | TGTATGAAGGTTTGGTCTCCCT     |
| <i>C3</i>      | Complement 3            | mouse   | C3_(2)_F                       | CTGAGAAGCGTCTCCATCAAG      |
|                |                         |         | C3_(2)_R                       | ACGGGCAGTAGGTTGTTGTC       |
| <i>Ccl2</i>    | MCP-1                   | mouse   | Ccl2_F                         | CTGAAGACCTTAGGGCAGAT       |
|                |                         |         | Ccl2_R                         | AAGGAATGGGTCCAGACATAC      |
| <i>Ccl20</i>   | MIP-3 $\alpha$          | mouse   | CCL20_F                        | GCCTCTCGTACATACAGACGC      |
|                |                         |         | CCL20_R                        | CCAGTTCTGCTTTGGATCAGC      |
| <i>Ccl5</i>    | Rantes                  | mouse   | Ccl5_(1)_F                     | GCTGCTTTGCCTACCTCTCC       |
|                |                         |         | Ccl5_(1)_F                     | TCGAGTGACAAACACGACTGC      |
| <i>Ccl7</i>    | MCP-3                   | mouse   | CCL7_(1)_F                     | GCTGCTTTCAGCATCCAAGTG      |
|                |                         |         | CCL7_(1)_R                     | CCAGGGACACCGACTACTG        |
| <i>Ptgs2</i>   | COX-2                   | mouse   | COX-2_F                        | TGAGCAACTATTCCAAACCAGC     |
|                |                         |         | COX-2_R                        | GCACGTAGTCTTCGATCACTATC    |
| <i>CSF1</i>    | M-CSF                   | mouse   | CSF1_(2)_F                     | AGTCAACAGAGCAACCAAACC      |
|                |                         |         | CSF1_(2)_R                     | CAAAAATCCCTCACTAGCCTCTC    |
| <i>Cxcl1</i>   | KC                      | mouse   | Cxcl1_(1)_F                    | CTGGGATTCACCTCAAGAACATC    |
|                |                         |         | Cxcl1_(1)_R                    | CAGGGTCAAGGCAAGCCTC        |
| <i>Cxcl10</i>  | IP-10                   | mouse   | Cxcl10_F                       | AGGACGGTCCGCTGCAA          |
|                |                         |         | Cxcl10_R                       | CATTCTCACTGGCCCGTCAT       |
| <i>Cxcl2</i>   | MIP-2                   | mouse   | Cxcl2_(1)_F                    | CCCTCAACGGAAGAACCAAAG      |
|                |                         |         | Cxcl2_(1)_R                    | TTCCCGGGTGCTGTTTGT         |
| <i>Edn1</i>    | endothelin-1            | mouse   | ET-1_(1)_F                     | GCACCGGAGCTGAGAATGG        |
|                |                         |         | ET-1_(1)_R                     | GTGGCAGAAGTAGACACACTC      |
| <i>Fos</i>     | c-Fos                   | mouse   | Fos_(2)_F                      | CCCATCCTTACGGACTCCC        |
|                |                         |         | Fos_(2)_R                      | GAGATAGCTGCTCTACTTTGCC     |
| <i>Icam1</i>   | ICAM1                   | mouse   | ICAM1_F                        | TGTCAGCCACTGCTTGTTGTA      |
|                |                         |         | ICAM1_R                        | CAGGATCTGGTCCGCTAGCT       |
| <i>Ifit1</i>   | Ifit1                   | mouse   | Ifit1_(1)_F                    | CTGAGATGTCACTTCACATGGAA    |
|                |                         |         | Ifit1_(1)_R                    | GTGCATCCCCAATGGGTTCT       |
| <i>Nfkbia</i>  | I $\kappa$ B $\alpha$   | mouse   | I $\kappa$ B $\alpha$ _F       | CTGCAGGCCACCAACTACAA       |
|                |                         |         | I $\kappa$ B $\alpha$ _R       | CAGCACCCAAAGTACCAAGT       |
| <i>Nfkbie</i>  | I $\kappa$ B $\epsilon$ | mouse   | I $\kappa$ B $\epsilon$ _(1)_F | TGGACCTCCAAGTGAAGAAGT      |
|                |                         |         | I $\kappa$ B $\epsilon$ _(1)_R | TTCTCTGCAATGTGGCAATG       |
| <i>Il1b</i>    | interleukin-1 $\beta$   | mouse   | IL-1b_(1)_F                    | GCAACTGTTCTGAACTCAACT      |
|                |                         |         | IL-1b_(1)_R                    | ATCTTTTGGGGTCCGTCAACT      |
| <i>IL6</i>     | interleukin 6           | mouse   | IL6_F                          | TAGTCCTTCCCTACCCCAATTTCC   |
|                |                         |         | IL6_R                          | TTGGTCCTTAGCCACTCCTTC      |
| <i>Irf1</i>    | Irf1                    | mouse   | IRF1_(2)_F                     | AGGCCGATACAAAGCAGGAGA      |
|                |                         |         | IRF1_(2)_R                     | GCTGCCCTTGTTCTACTCTG       |
| <i>Jun</i>     | c-Jun                   | mouse   | Jun_(2)_F                      | ACTCGGACCTTCTCACGTC        |
|                |                         |         | Jun_(2)_R                      | CGGTGTAGTGGTGATGTGCC       |
| <i>Rpl32</i>   | L32                     | mouse   | L32_F                          | AAGCGAAACTGGCGGAAAC        |
|                |                         |         | L32_R                          | TAACCGATGTTGGGCATCAG       |
| <i>Mmp10</i>   | MMP-10                  | mouse   | MMP-10_(2)_F                   | AACACGGAGACTTTTACCCTTTT    |
|                |                         |         | MMP-10_(2)_R                   | GGTGCAAGTGTCCATTTCTCAT     |
| <i>Mmp13</i>   | MMP-13                  | mouse   | MMP-13_(2)_F                   | ACCTCCACAGTTGACAGGCT       |
|                |                         |         | MMP-13_(2)_R                   | AGGCACTCCACATCTTGTTTT      |

### Supplementary Table 3. Continued

| <b>name</b>      | <b>alias</b>          | <b>species</b> | <b>primer name</b>             | <b>sequence</b>                                     |
|------------------|-----------------------|----------------|--------------------------------|-----------------------------------------------------|
| <i>Mmp3</i>      | MMP-3                 | mouse          | MMP-3_(2)_F<br>MMP-3_(2)_R     | TGTCCCGTTTCCATCTCTCTC<br>TGGTGATGTCTCAGGTTCCAG      |
| <i>Saa3</i>      | Saa3                  | mouse          | Saa3_(1)_F<br>Saa3_(1)_R       | TGCCATCATTCTTTGCATCTTGA<br>CCGTGAACTTCTGAACAGCCT    |
| <i>Serpina3g</i> | Spi2A                 | mouse          | Spi2A_(1)_F<br>Spi2A_(1)_R     | CTTCCAACGGCTGGAATCTA<br>ACTGTCCAATCAGGCATAGCG       |
| <i>TLR2</i>      | TLR2                  | mouse          | TLR2_(3)_F<br>TLR2_(3)_R       | CCAGACACTGGGGTAACATC<br>CGGATCGACTTTAGACTTTGGG      |
| <i>Tnf</i>       | TNF $\alpha$          | mouse          | TNF_F<br>TNF_R                 | CTACTCCCAGGTTCTCTTCAA<br>GCAGAGAGGAGGTTGACTTTT      |
| <i>Vcam1</i>     | Vcam1                 | mouse          | Vcam1_(1)_F<br>Vcam1_(1)_R     | AGTTGGGGATTTCGGTTGTCT<br>CCCCTCATTCCTTACCACCC       |
| <i>Zfp36</i>     | TTP                   | mouse          | Zfp36_(1)_F<br>Zfp36_(1)_R     | TCTCTGCCATCTACGAGAGCC<br>CCAGTCAGGCGAGAGGTGA        |
| <i>Zfp36</i>     | TTP                   | mouse          | Zfp36_(2)_F<br>Zfp36_(2)_R     | TCGAAGAGACCCTAACCCAGGC<br>GCGTAGTCATCAGGATCGGA      |
| <i>C3</i>        | C3                    | human          | hC3_(1)_F<br>hC3_(1)_R         | CCTGCTACTAACCACCTCC<br>AACAGTGACTGGAACATCCCC        |
| <i>CCL2</i>      | MCP-1                 | human          | hCCL2_(1)_F<br>hCCL2_(1)_R     | CAGCCAGATGCAATCAATGCC<br>TGGAATCCTGAACCCACTTCT      |
| <i>CCL5</i>      | Rantes                | human          | hCCL5_F<br>hCCL5_R             | CCCAGCAGTCGTCTTTGTCA<br>TCCCGAACCCATTTCTTCTCT       |
| <i>CXCL1</i>     | CXCL1                 | human          | hCXCL1_F<br>hCXCL1_R           | CTGCGCTGCCAGTGCTTGCA<br>TGTGGCTATGACTTCGGTTTG       |
| <i>CXCL10</i>    | IP-10                 | human          | hCXCL10_(1)_F<br>hCXCL10_(1)_R | GTGGCATTCAAGGAGTACCTC<br>GCCTTCGATTCTGGATTCAGACA    |
| <i>FOS</i>       | c-FOS                 | human          | hFOS_(3)_F<br>hFOS_(3)_R       | GGGCAAGGTGGAACAGTTATC<br>CCGCTTGAGTGTATCAGTCA       |
| <i>GAPDH</i>     | GAPDH                 | human          | hGAPDH_F<br>hGAPDH_R           | AACAGCGACACCCACTCCTC<br>CATACCAGGAAATGAGCTTGACAA    |
| <i>ICAM1</i>     | ICAM1                 | human          | hiCAM1_(1)_F<br>hiCAM1_(1)_R   | TCTGTGTCCCCCTCAAAAGTC<br>GGGGTCTCTATGCCCAACAA       |
| <i>NFKBIA</i>    | I $\kappa$ B $\alpha$ | human          | hIkBa_(1)_F<br>hIkBa_(1)_R     | CTCCGAGACTTTTCGAGGAAATAC<br>GCCATTGTAGTTGGTAGCCTTCA |
| <i>IL6</i>       | Interleukin6          | human          | hIL-6_(1)_F<br>hIL-6_(1)_R     | AAATTCGGTACATCCTCGACGG<br>GGAAGGTTTCAGGTTGTTTTCTGC  |
| <i>Rpl32</i>     | Rpl32                 | human          | hL32_F<br>hL32_R               | AGCTCCCAAAAATAGACGCAC<br>TTCATAGCAGTAGGCACAAAGG     |
| <i>GFP</i>       | GFP                   |                | GFP_(BMC)_F<br>GFP_(BMC)_R     | GGAGCGCACGATCTTCTTCA<br>AGGGTGTCCGCTCGAA            |
| <i>GFP</i>       | GFP                   |                | GFP_(6)_F<br>GFP_(6)_R         | ACTTCAAGATCCGCCACAACA<br>TGGGTGCTCAGGTAGTGGTTG      |
